# Supplementary material for: A fine-scale recombination map of the human–chimpanzee ancestor reveals faster change in humans than in chimpanzees and a strong impact of GC-biased gene conversion
Source: HighWire-hosted journal article supplement (doi:10.1101/gr.158469.113), 2013-11-04
Supplement: SuppMaterial.docx [file SuppMaterial.docx]

**Supplementary Information**

**Text S1: CoalHMM analysis**

Along an alignment, divergence times between species differ due to segregating polymorphism in the ancestral species. For some species the population size of the ancestral species is sufficiently large and the time span between speciation events sufficiently small that ancestral polymorphism may lead to gene trees with a topology different from the species tree. This phenomenon is termed incomplete lineage sorting (ILS) and implies that segments of the genome will share an ancestor with a species other than its sister species in the species tree.

The CoalHMM framework (Hobolth et al. 2007; Dutheil et al. 2009) allows for inference of population genetic parameters and patterns of ILS. The framework is based on a hidden Markov model (HMM) where the hidden states along the alignment represent gene trees with separate topologies and separate coalescent times. We apply the model to the full genomes of human, chimpanzee, gorilla and orangutan (using orangutan as outgroup). The demographic model applied is a three species isolation model (Figure S1). The demographic parameters of the model are two ancestral population sizes, Ne1, Ne2, and two speciation times, T1, T2. These parameters are all scaled with the substitution rate.

The coalescent HMM method used for this analysis employs a hidden Markov model with the four trees in figure S2 as hidden states: the human and chimpanzee may find a common ancestor in their ancestral population (Figure S2 top left) or in the population ancestral to all three species (Figure S2 top right), and gorilla may find a common ancestor with either the human or the chimpanzee in the population ancestral to all three species (Figure S2 bottom left and right). The transition matrix is parameterized using coalescent theory. The probability of emitting a column in the alignment from a state is calculated as the probability of the underlying tree given the four bases. The likelihood of the model given a set of model parameters is calculated using the forward algorithm. The maximum likelihood of the coalescent HMM is found using a modified Newton-Raphson algorithm.

**Fig. S1**: Isolation model used in the analysis. T1: speciation time of human and chimpanzee. T2: speciation time of human and gorilla. Ne1: effective population size of the ancestor to human and chimpanzee. Ne2 : effective population size of the ancestor to all three species.

**Fig. S2:** Outline of the four states in the HMM. The four states correspond to the four different trees describing the ancestry of an alignment column. Arrows indicate possible transitions.

**Fig. S3:** Number of inferred recombination events in 100kb of alignment as function of simulated recombination rate.

**Fig. S4**: Difference to the human (HapMap) map (red) and chimpanzee (PanMap) (blue) in 2Mb windows. Impulses above each line designate larger rate relative to the HC-map and below indicates a smaller rate. Approximate coordinates of major inversions are obtained from the chimpanzee genome paper (Chimpanzee Sequencing and Analysis Consortium 2005) and Newman et al. 2005 (Newman 2005) and mapped to hg19 coordinates using the liftover tool (Hinrichs et al. 2006). The distance between lines correspond to 5 cM/Mb.

**Fig. S5**: The recombination rates for all three maps plotted in 2Mb bins for chromosome 2. Ancestral (green), Human (red), Chimpanzee (blue). The ancestral map identifies a marked decrease human recombination on chromosome 2 where the ancestral chromosomes 2a and 2b fused

**Fig. S6**: The recombination rates for all three maps plotted in 2Mb bins for chromosome 18. Ancestral (green), Human (red), Chimpanzee (blue). The large peri-centric inversion on the human branch has resulted in a marked increase in recombination rate.

**Fig. S7**: Mean ancestral rates are plotted against human and chimpanzee mean. Each map is normalized to a mean rate of one. On a chromosome wide scale the relative means for chromosomes generally agree. In addition to the human pericentric inversion on chromosome 18 a small part of chromosome 15 is involved in a pericentric inversion in chimpanzee (however, this genomic region is represented by very few data points).

**Fig. S8:** Spearman correlation for non-overlapping bins quadrupling in size between ancestral, human and chimpanzee maps. Ancestor vs. human: red, ancestor vs. chimpanzee: blue, human vs. chimpanzee: grey. Confidence intervals and significance of differences are obtained using bootstrapping. The second bar plot (non-inversions excluding chr2) is identical to Fig. 4 in the main text. Here the only comparisons not significant (p-values > 0.05) are the ancestral-chimpanzee vs. ancestral-human for 40kb and 2.56Mb, and the ancestral-human vs. human-chimpanzee for 640kb and 2.56Mb. In the first bar plot all ancestral-human vs. ancestral-chimpanzee comparisons are significant. In the third bar plot all ancestral-human vs. ancestral-chimpanzee and ancestral-human vs. human-chimpanzee comparisons are significant except ancestral-human vs. ancestral-chimpanzee at 40kb. A stronger correlation between ancestral and human recombination would be consistent with the human inversions segregating in the ancestor before fixing in humans. In the fourth bar plot only ancestral-human vs. ancestral-chimpanzee are significant at 10kb.

**Fig. S9:** Spearman correlation between ancestral, human and chimpanzee maps for non-inverted part of individual chromosomes. Bin sizes as in Fig. S8. Ancestor vs. human: red, ancestor vs. chimpanzee: blue, human vs. chimpanzee: grey. Confidence intervals are obtained by bootstrapping.

**Text S3: Overlap of recombination events available to an extant also available to an ancestral map**

To calculate the expected proportion of recombination events available to an LD-based map of an extant species also available to an ancestral ILS-based map we follow Tavaré and Forsberg et al. (Tavare 1984; Forsberg et al. 2005) that give the probability that *b* lineages from a sample of size *a* remain at time *t* back in time (*t* is scaled in *N* generations).

for , where , and .

Linkage disequilibrium based methods used to construct recombination maps primarily exploit information from recombination events that change the topology of the genealogy. Such recombination events must fall in the tree while at least three lineages are left ().

Assuming a sample size of ten as used in the PanMap, the expected number of branches at time *t*, in the part of the tree where at least three lineages remain can then be computed as

Assuming a constant recombination rate over time makes this is a proxy for the distribution in time of recombination events available to an extant recombination map.

The probability that two lineages produced by a recombination event at time *t* does not coalesce before the Human-Chimpanzee speciation time is . The probability that a recombination event available to an extant map is also available to an ancestral map is thus

**Fig. S10:** Evolutionary divergence time between the simulated recombination events expected to be included in the ancestral map and present humans and present chimpanzees. In calculating the divergence across different species we assume an Ne of 73.000 in the human-chimpanzee ancestor and an Ne of 39.000 in the human-chimpanze-gorilla ancestor. The mean divergence time to present chimpanzee is only marginally smaller: 4798059 vs. 4806319 in humans.

**Text S4: Overlap in time of substitutions and measured recombination.**

Assuming split times and population sizes reported in Scally et al. 24% of substitutions on the human-chimpanzee branch occurred in the time span between the human-chimpanzee and human-gorilla splits where recombination is measured: if the ancestral effective population sizes are *NHC*=73,200 and *NHCG*=39,000, and the number of generations between speciation events, *t*, is (5.95e6-3.7e6)/20, then, given that the human and chimpanzee lineages coalesce before the human-gorilla split, the expected coalescence time is:

In counting substitutions we assume the canonical species topology and discard alignment columns indicating ILS. The expected time to coalescence after human-gorilla split is therefore *b*=2*NeHCG* and we get the above mentioned proportion as:

**Fig. S11:** GC* as a function of mean recombination rate in 1Mb bins for the ancestor, human and chimpanzee respectively. Each plot shows the statistic calculated non-CpG sites (red line) and CpG sites (blue line).

**Fig. S12:** GCflux as a function of mean recombination rate in 1Mb bins for the ancestor, human and chimpanzee respectively. Each plot shows the statistic calculated non-CpG sites (red line) and CpG sites (blue line).

**Fig. S13:** Linear model of human GC* explained by ancestral and human recombination rates.

**Fig. S14:** Mean GC* in 2Mb bins across the fusion region of chromosome 2. We observe a marked increase in GC* at the fusion point in all three species. That the human lineage has also been subject to a strong effect of gBGC in this region suggests that the fusion must have happened quite some time after the most recent common ancestor of human and chimpanzees (Dreszer et al. 2007) and stresses that the substitution pattern on the human lineage is only explained well by addressing the ancient recombination patterns supplied by our map.

**Fig. S15:** Pearson correlation between GC* and recombination rate in non-overlapping bins in the non-inverted regions of the three maps. Confidence intervals are obtained using bootstrapping. Stars indicate the bin sizes for which the ancestral map is more correlated to the chimpanzee map than to the human map. The human-chimpanzee correlation should not be compared to the two other correlations since the criterion (by necessity) for calling a substitution on the ancestral (internal) branch is different from that used to call on external branches. However, all correlations are included here for completion.

**References**

Chimpanzee Sequencing and Analysis Consortium. 2005. Initial sequence of the chimpanzee genome and comparison with the human genome. *Nature* **437**: 69–87.

Dreszer TR, Wall GD, Haussler D, Pollard KS. 2007. Biased clustered substitutions in the human genome: The footprints of male-driven biased gene conversion. *Genome Research* **17**: 1420–1430.

Dutheil JY, Ganapathy G, Hobolth A, Mailund T, Uyenoyama MK, Schierup MH. 2009. Ancestral population genomics: the coalescent hidden Markov model approach. *Genetics* **183**: 259–274.

Forsberg R, Drummond AJ, Hein J. 2005. Tree measures and the number of segregating sites in time-structured population samples. *BMC Genet* **6**: 35.

Hinrichs AS, Karolchik D, Baertsch R, Barber GP, Bejerano G, Clawson H, Diekhans M, Furey TS, Harte RA, Hsu F, et al. 2006. The UCSC Genome Browser Database: update 2006. *Nucleic Acids Res* **34**: D590–8.

Hobolth A, Christensen OF, Mailund T, Schierup MH. 2007. Genomic relationships and speciation times of human, chimpanzee, and gorilla inferred from a coalescent hidden Markov model. *PLoS Genet* **3**: e7.

Newman TL. 2005. A genome-wide survey of structural variation between human and chimpanzee. *Genome Research* **15**: 1344–1356.

Tavaré S. 1984. Line-of-descent and genealogical processes, and their applications in population genetics models. *Theor Popul Biol* **26**: 119-164*Nature* **483**: 169–175.
